# Supplementary material for: Stable chlorine isotope composition of chlorofluorocarbons and chloromethane in the troposphere
Source: Copernicus journal article supplement (doi:10.5194/egusphere-2025-3652), 2025-09-19
Supplement: Supplementary file 1 [file egusphere-2025-3652-supplement.pdf]

## **Table of contents:**

Figure S1: Graphical output files created by the HYSPLIT model for February 3, February 4, March 31, April 19, April 22, and April 26, 2022

Figure S2: Graphical output files created by the HYSPLIT model for May 16, May 24, June 2, June 16, July 12, and July 25, 2022

Figure S3: Graphical output files created by the HYSPLIT model for July 28, August 2, August 10, August 24, August 26, and September 1, 2022

Figure S4: Graphical output files created by the HYSPLIT model for September 28, October 21, October 25, November 2, November 15, and November 30, 2022

Figure S5: Graphical output files created by the HYSPLIT model for December 2, December 7, and December 22, 2022 as well as January 3, January 18, and January 31, 2023

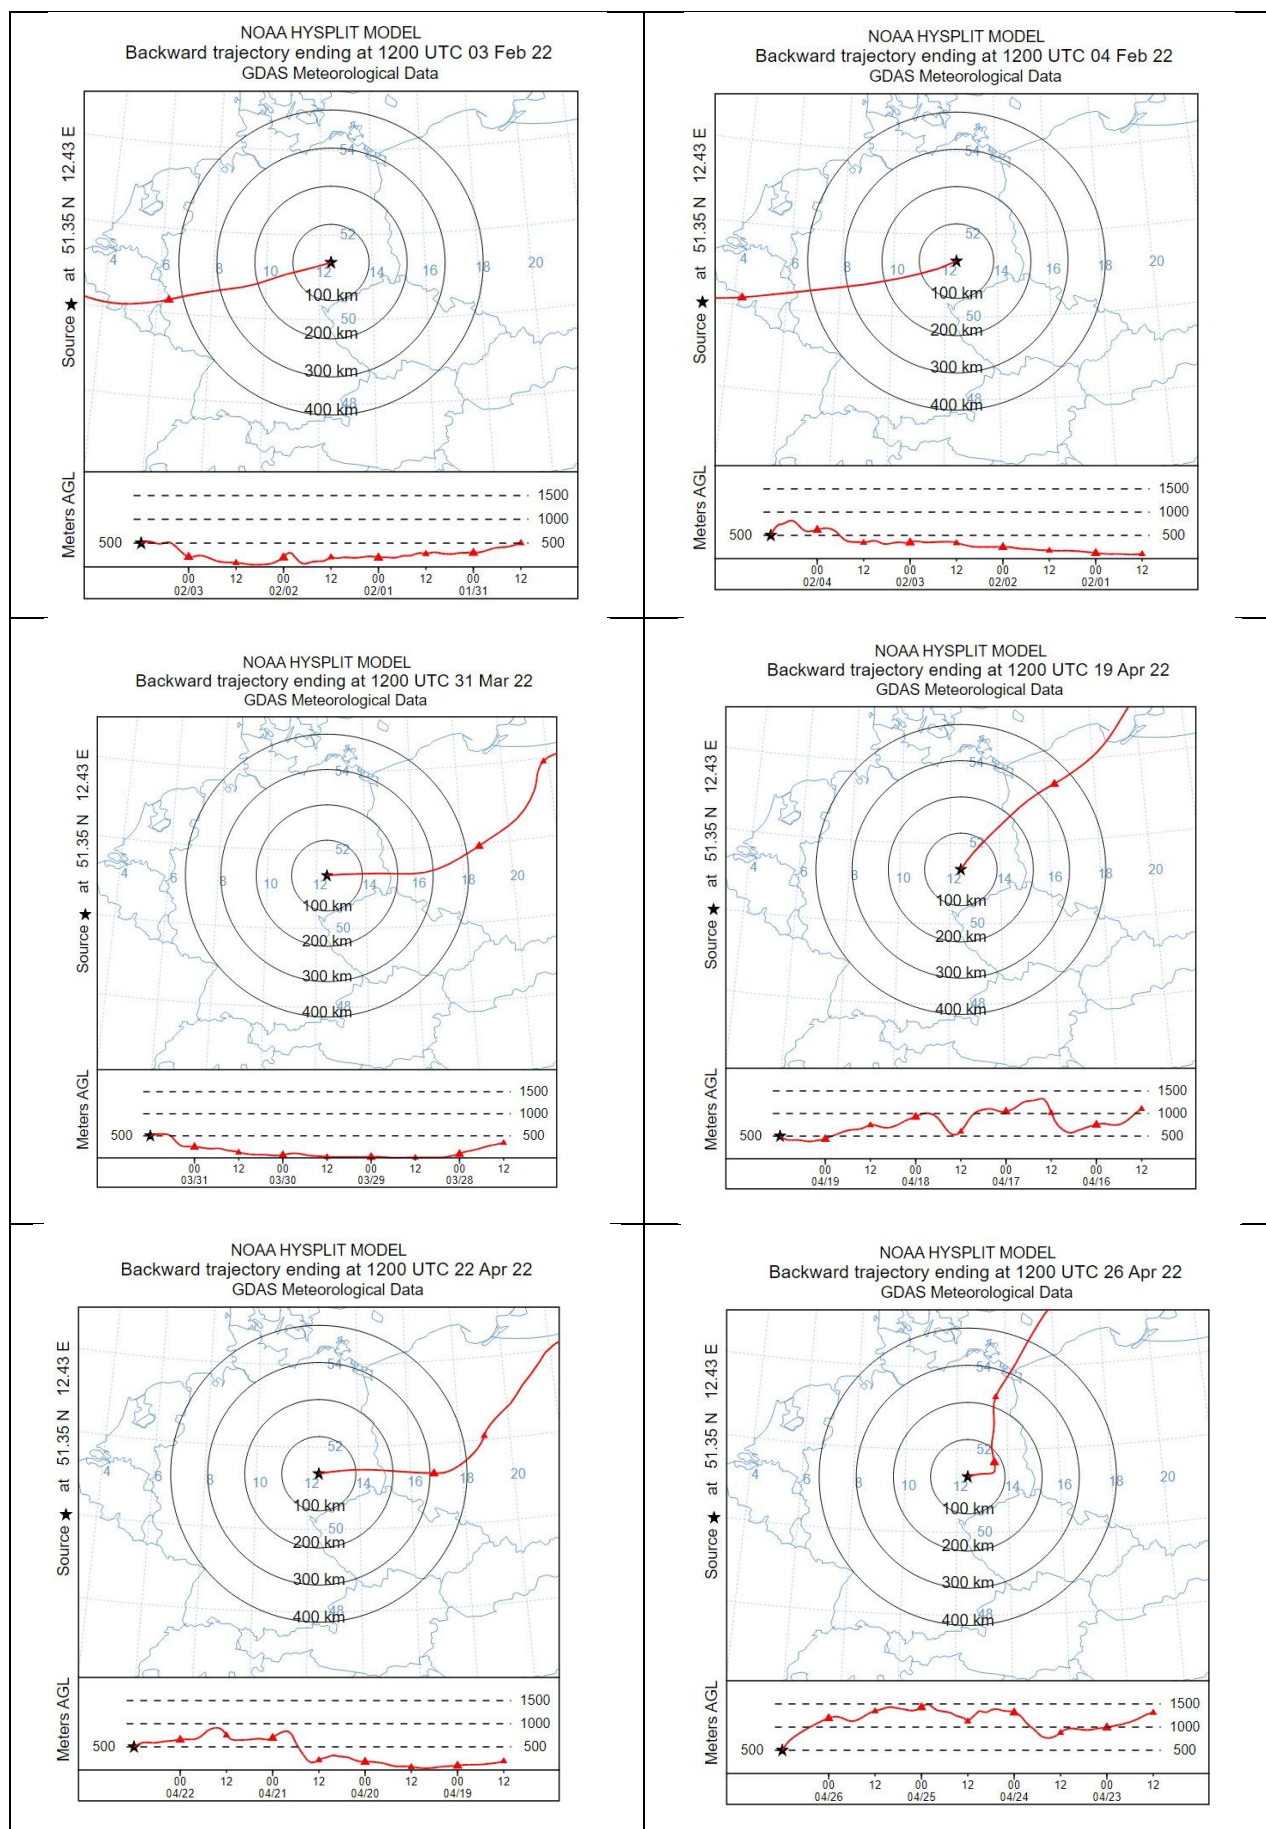

Figure S1: Graphical output files created by the HYSPLIT model for February 3, February 4, March 31, April 19, April 22, and April 26, 2022

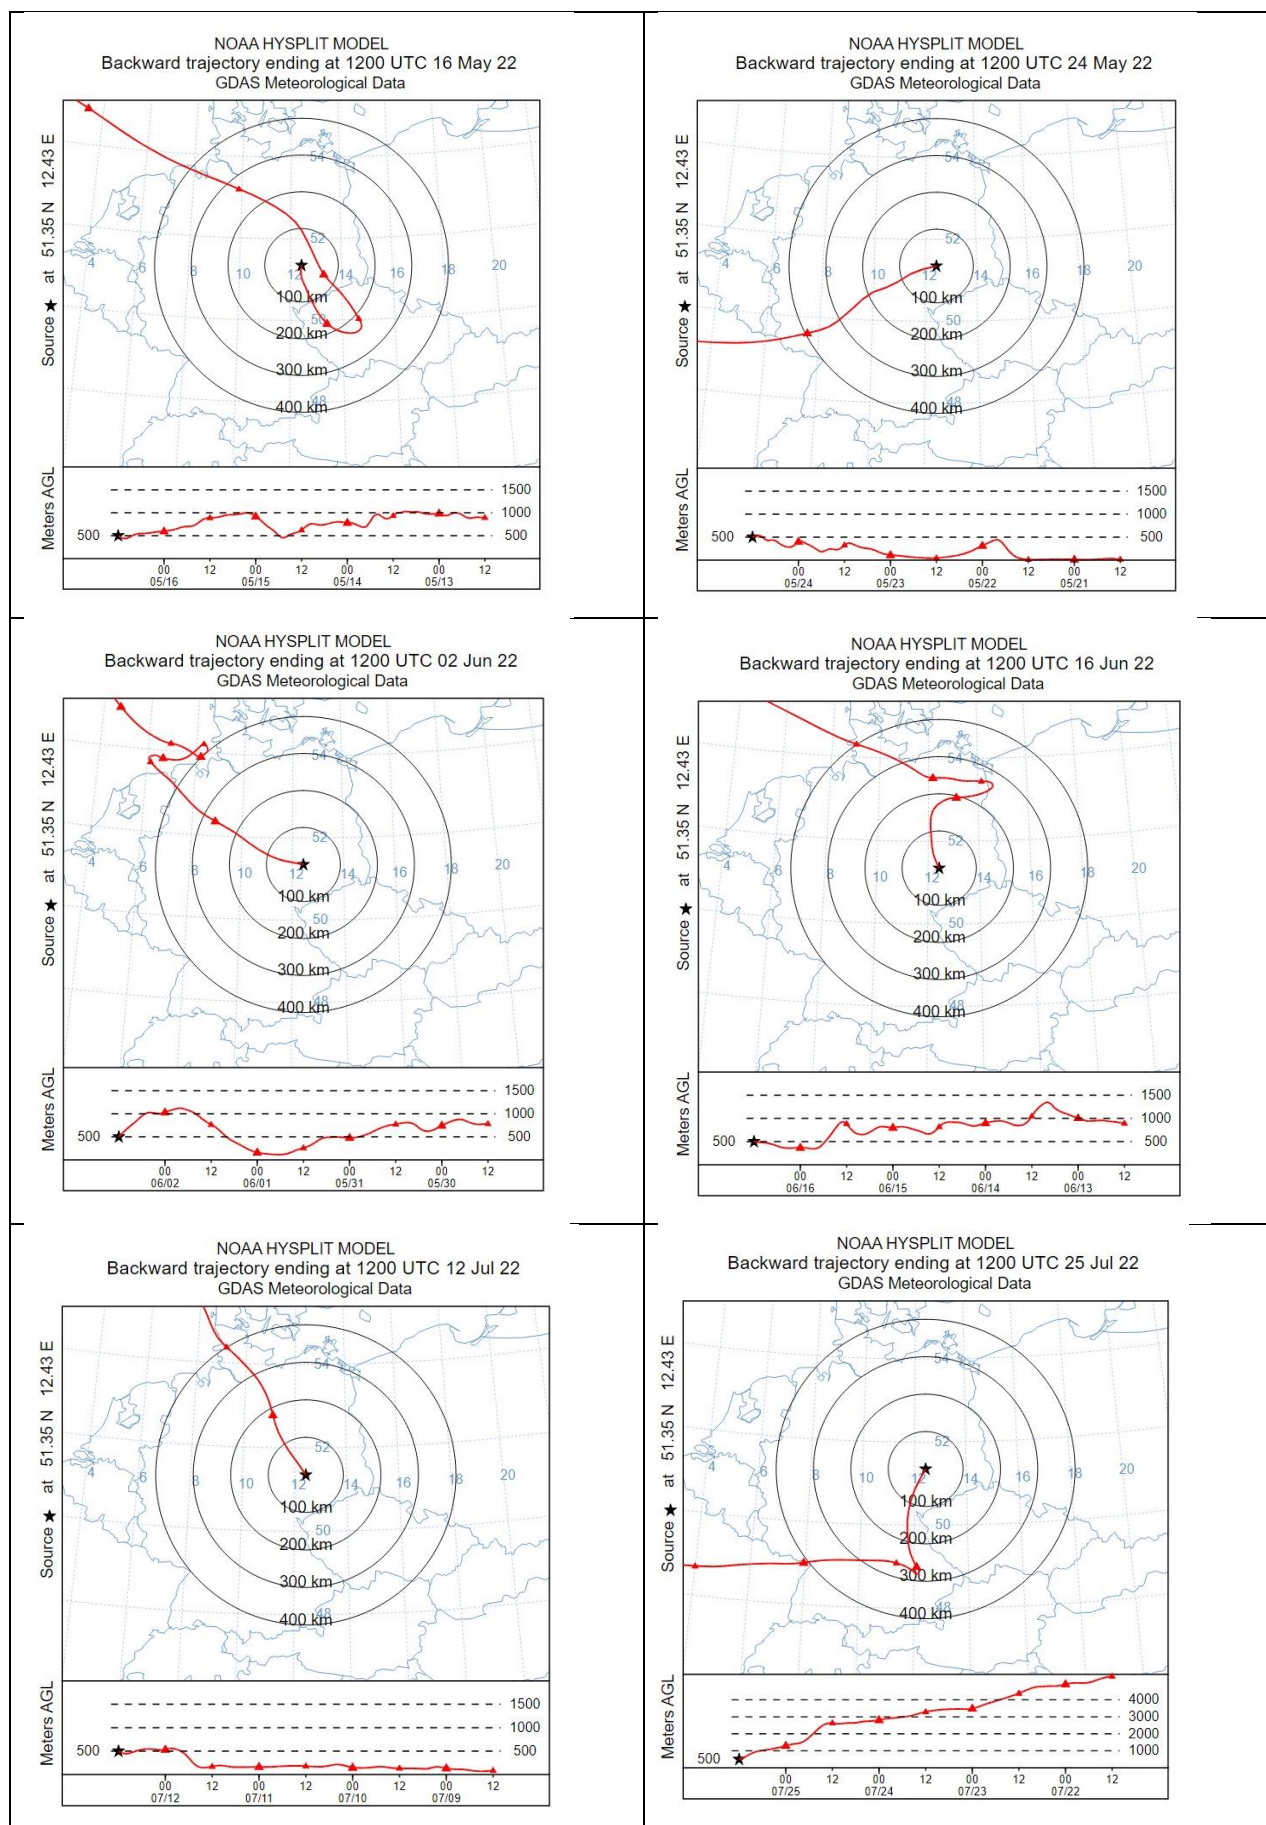

Figure S2: Graphical output files created by the HYSPLIT model for May 16, May 24, June 2, June 16, July 12, and July 25, 2022



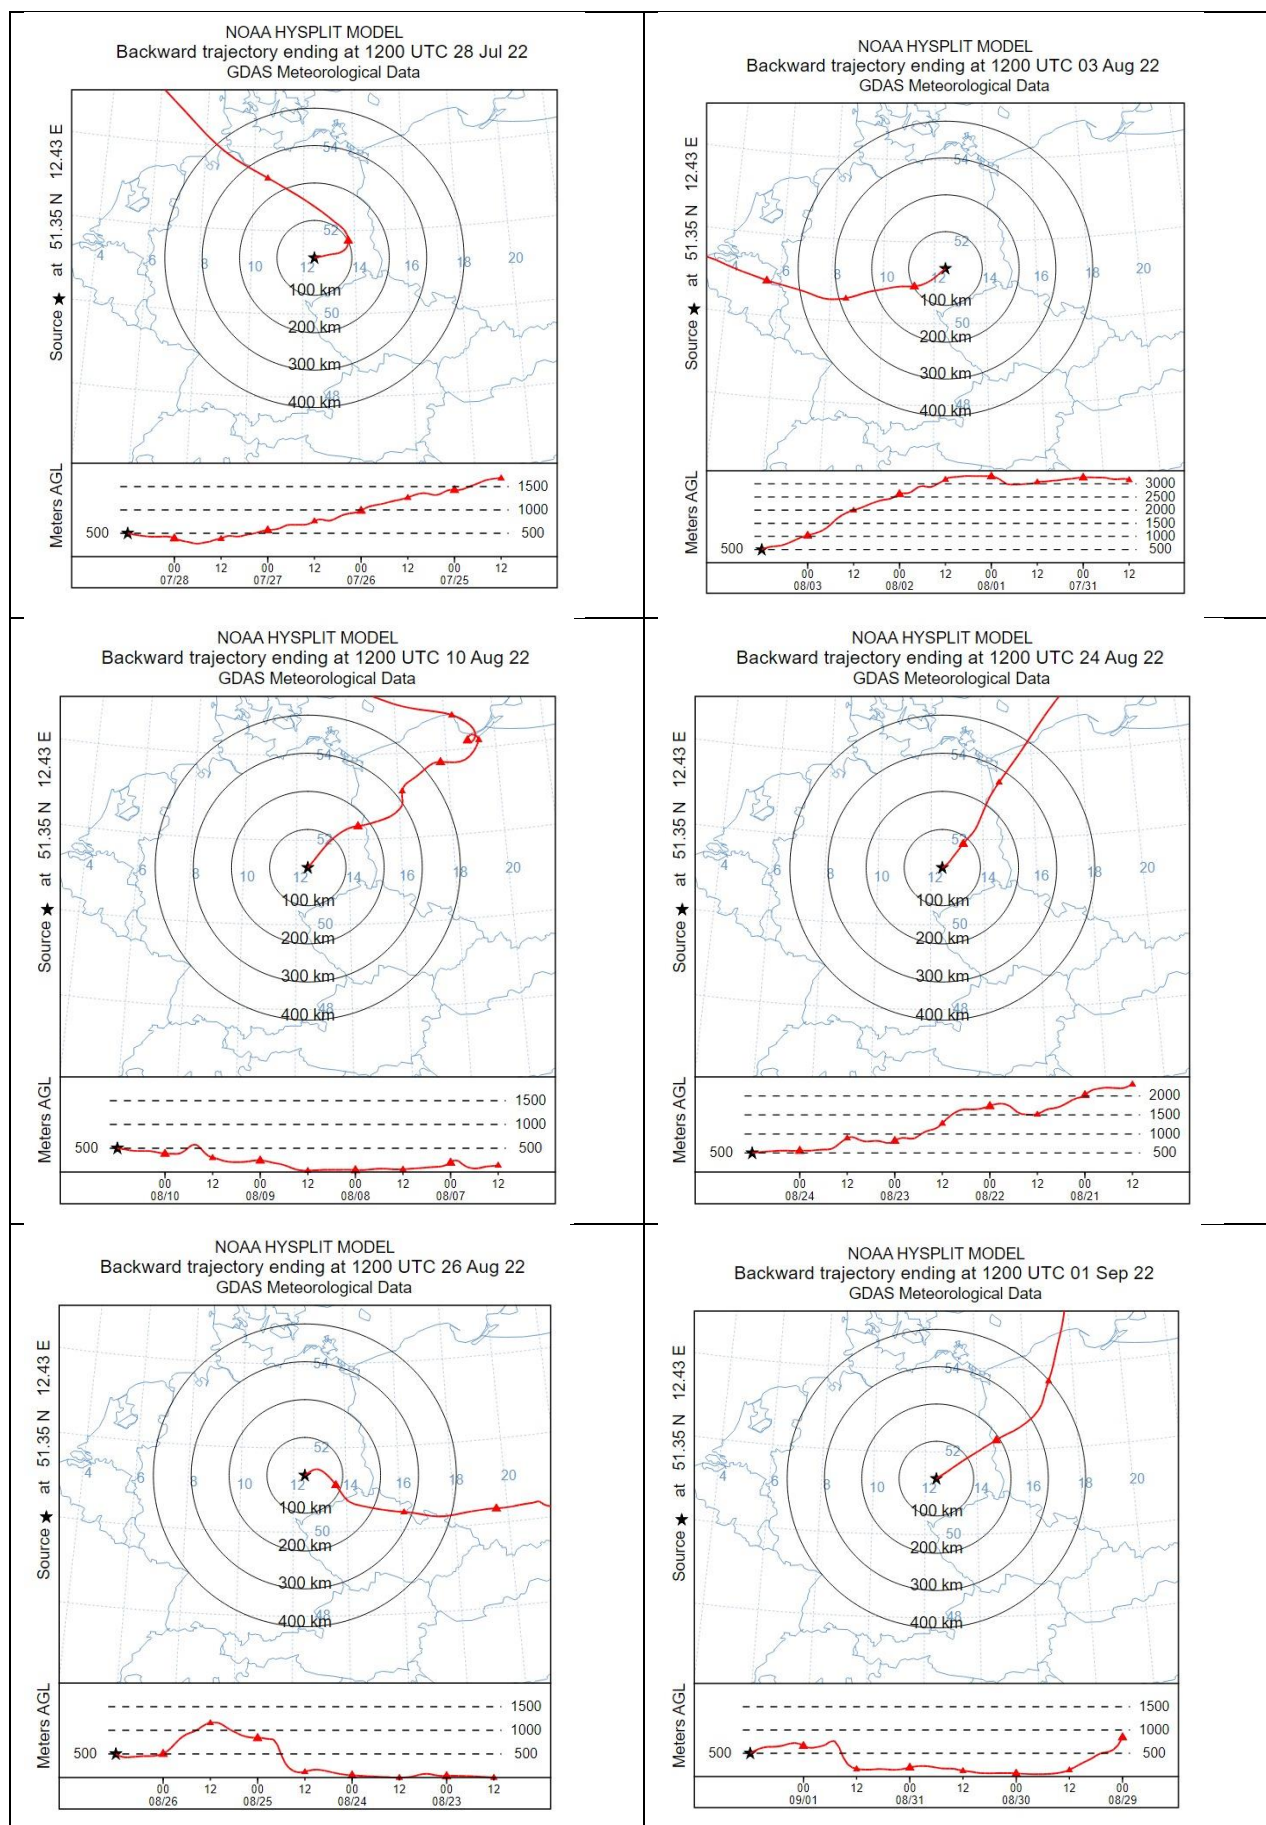

Figure S3: Graphical output files created by the HYSPLIT model for July 28, August 2, August 10, August 24, August 26, and September 1, 2022

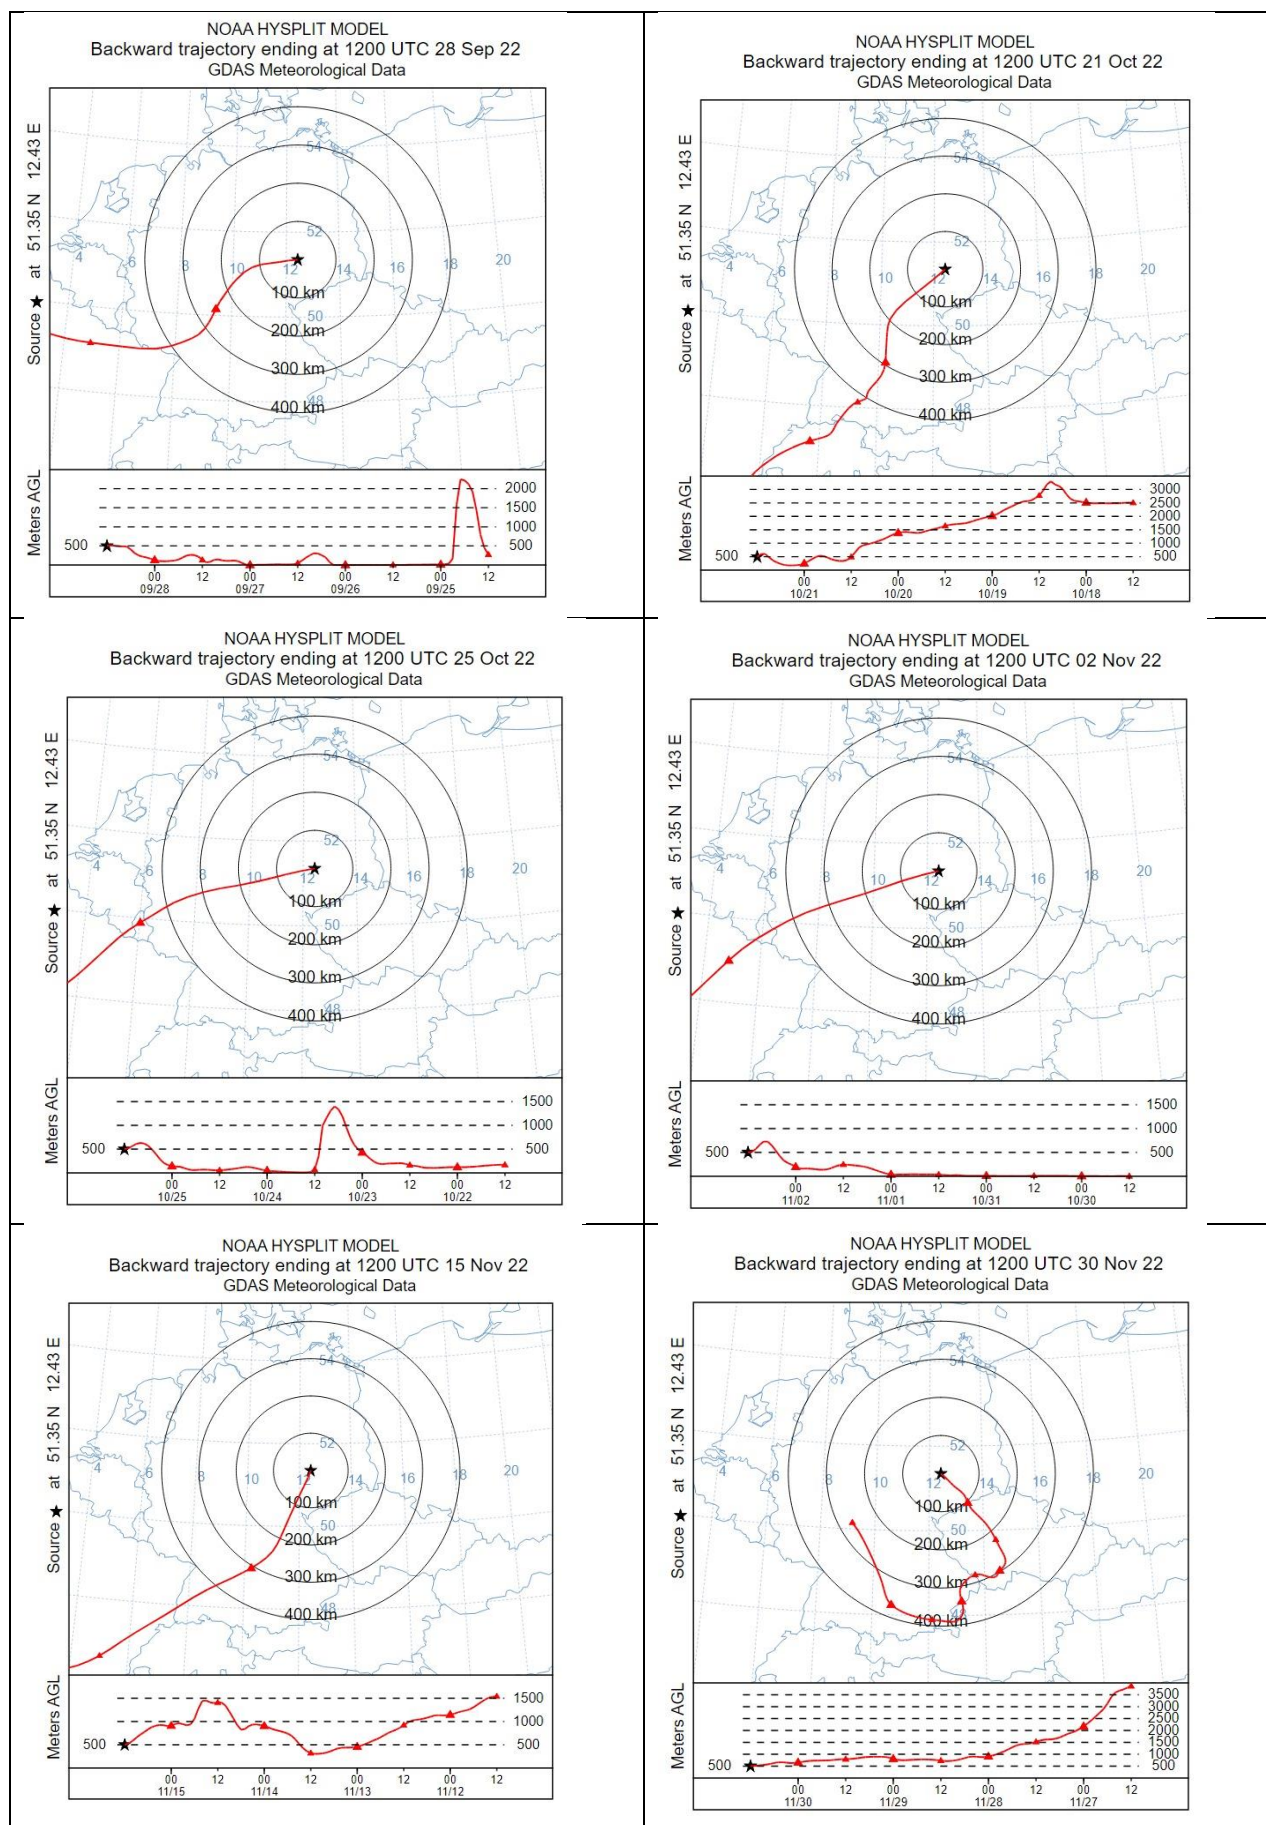

Figure S4: Graphical output files created by the HYSPLIT model for September 28, October 21, October 25, November 2, November 15, and November 30, 2022



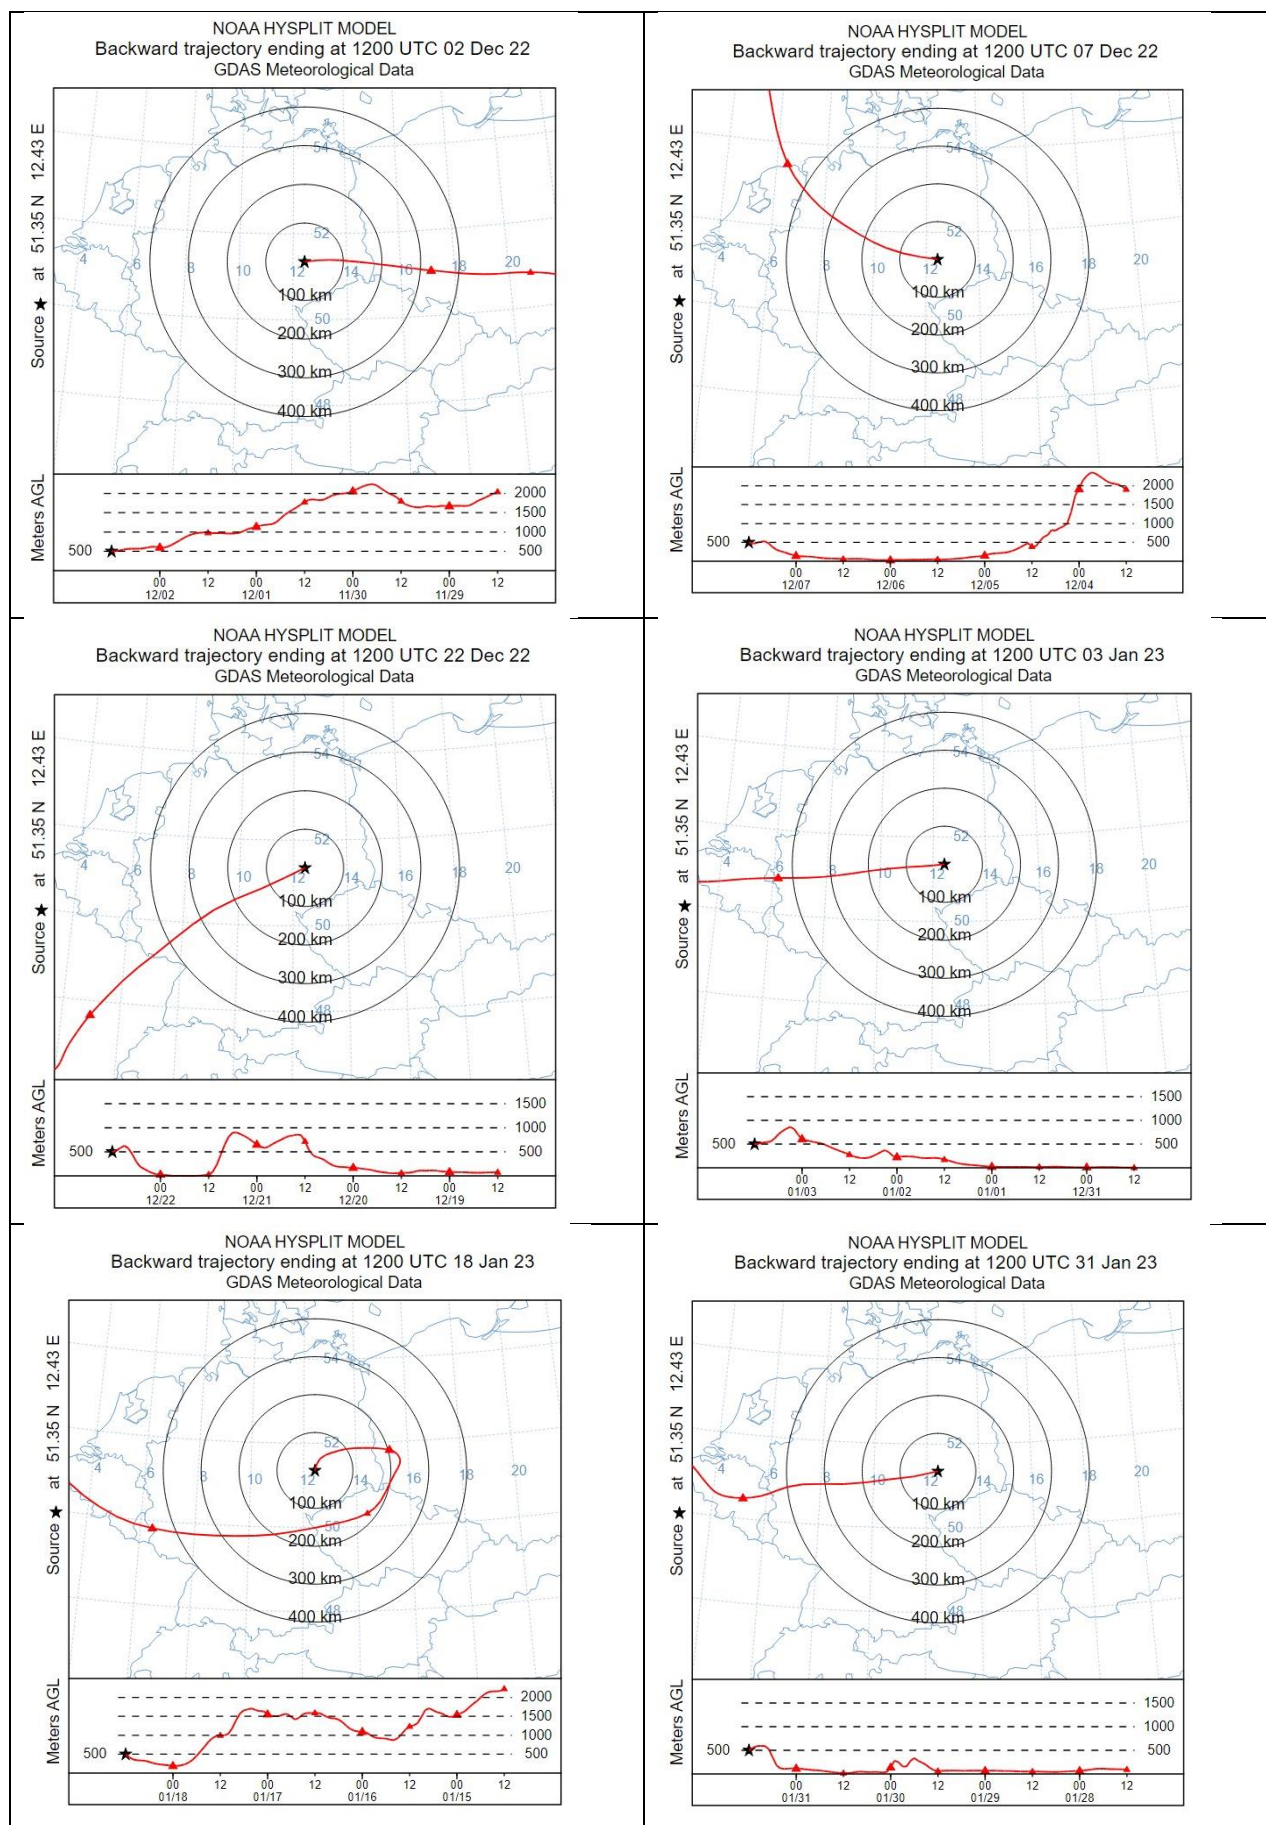

Figure S5: Graphical output files created by the HYSPLIT model for December 2, December 7, and December 22, 2022 as well as January 3, January 18, and January 31, 2023
